# Supplementary material for: Proton conductivity in mixed cation phosphate, KMg1−xH2x(PO3)·yH2O, with a layered structure at low-intermediate temperatures
Source: Royal Society of Chemistry journal article supplement (doi:10.1039/d1dt01187a), 2021-01-01
Supplement: d1dt01187a1.pdf [file d1dt01187a1.pdf]

## Supporting Information of Proton conductivity in mixed cation phosphate, $\text{KMg}_{1-x}\text{H}_{2x}(\text{PO}_3)\cdot y\text{H}_2\text{O}$ , with a layered structure at low-intermediate temperatures

Yasuaki Matsuda<sup>a\*</sup>, Naoya<sup>a</sup> Ueda<sup>a</sup>, Kousei Funakoshi<sup>a</sup>, Jun Nakajima<sup>a</sup>, Daisuke Mori<sup>b</sup>, Sou Taminato<sup>b</sup>,  
Shinya Higashimoto<sup>a</sup>

<sup>a</sup>Department of Applied Chemistry, Faculty of Engineering, Osaka Institute of Technology, 5-16-1  
Ohmiya, Asahi-Ku, Osaka, 535-8585, Japan.

<sup>b</sup>Department of Chemistry for Materials, Graduate School of Engineering, Mie University, 1577  
Kurimamachiya-cho, Tsu, Mie 514-8507, Japan

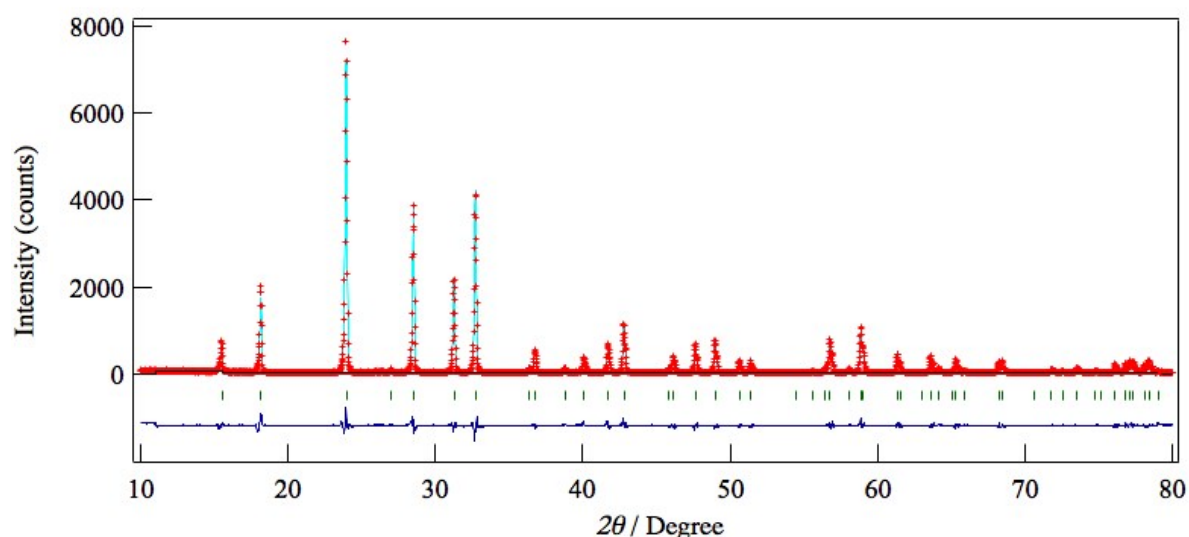

**Fig. S1** The final X-ray Rietveld refinement patterns for  $\text{KMg}_{1-x}\text{H}_{2x}(\text{PO}_3)\cdot y\text{H}_2\text{O}$  ( $x = 0$ ).

**Table S1** The refined structural parameters for the sample with  $x = 0$ .

| Atom | Site | <i>g</i> | <i>x</i>  | <i>y</i>   | <i>z</i>  | <i>B</i> / Å <sup>2</sup> |
|------|------|----------|-----------|------------|-----------|---------------------------|
| K    | 2e   | 1.0      | 2/3       | 1/3        | 0         | 0.5                       |
| Mg   | 2c   | 1.0      | 1/3       | 2/3        | 0         | 0.5                       |
| P    | 6k   | 1.0      | 0.2235(3) | -0.0605(3) | 1/4       | 0.5                       |
| O(1) | 6k   | 1.0      | 0.2408(7) | 0.1885(5)  | 1/4       | 1.0                       |
| O(2) | 12l  | 1.0      | 0.3271(4) | -0.0772(3) | 0.1196(2) | 1.0                       |

Space group: *P*-6*c*2, *a* = 6.6057(2) Å, 9.7709(10) Å, *R*<sub>wp</sub> (%) = 14.65,  
*R*<sub>p</sub> (%) = 10.14, *R*<sub>e</sub> (%) = 9.35, *R*<sub>B</sub> (%) = 3.75, *R*<sub>F</sub> (%) = 3.35, *S* = 1.57.

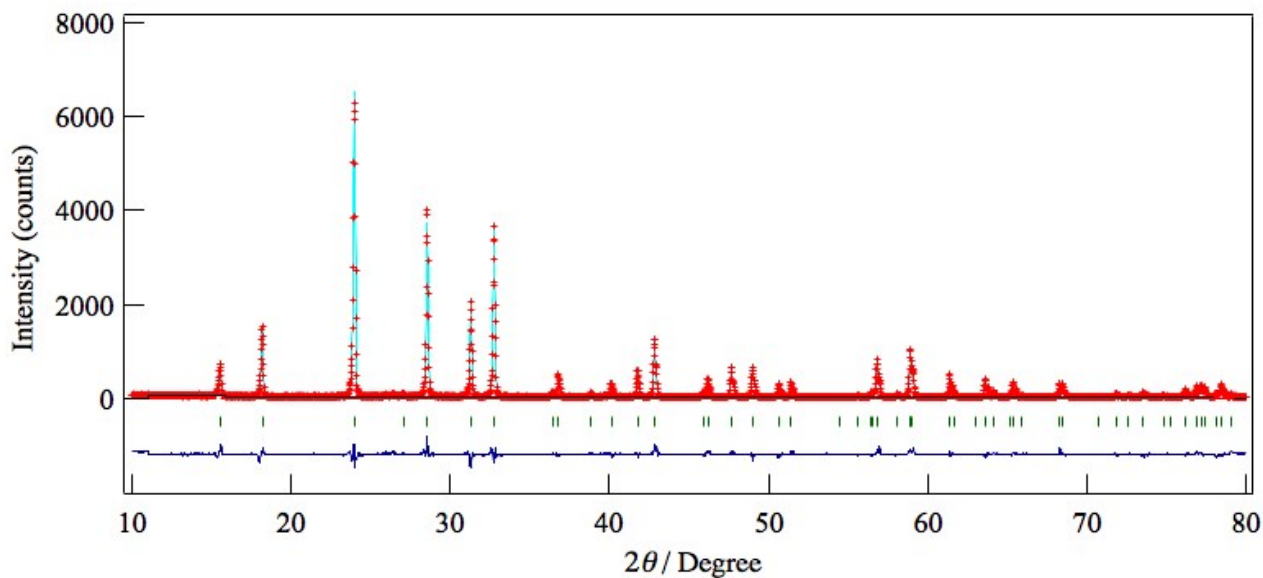

**Fig. S2** The final X-ray Rietveld refinement patterns for  $\text{KMg}_{1-x}\text{H}_{2x}(\text{PO}_3) \cdot y\text{H}_2\text{O}$  ( $x = 0.10$ ).

**Table S2** The refined structural parameters for the sample with  $x = 0.10$

| Atom | Site | $g$ | $x$       | $y$        | $z$       | $B / \text{\AA}^2$ |
|------|------|-----|-----------|------------|-----------|--------------------|
| K    | 2e   | 1.0 | 2/3       | 1/3        | 0         | 0.5                |
| Mg   | 2c   | 0.9 | 1/3       | 2/3        | 0         | 0.5                |
| P    | 6k   | 1.0 | 0.2266(3) | -0.064(3)  | 1/4       | 0.5                |
| O(1) | 6k   | 1.0 | 0.2415(7) | 0.1795(5)  | 1/4       | 1.0                |
| O(2) | 12l  | 1.0 | 0.3244(4) | -0.0814(4) | 0.1160(2) | 1.0                |

Space group:  $P-6c2$ ,  $a = 6.6005(2) \text{ \AA}$ ,  $9.7665(4) \text{ \AA}$ ,  $R_{\text{wp}} (\%) = 16.08$ ,  
 $R_p (\%) = 11.50$ ,  $R_e (\%) = 9.65$ ,  $R_B (\%) = 7.41$ ,  $R_F (\%) = 5.71$ ,  $S = 1.66$ .

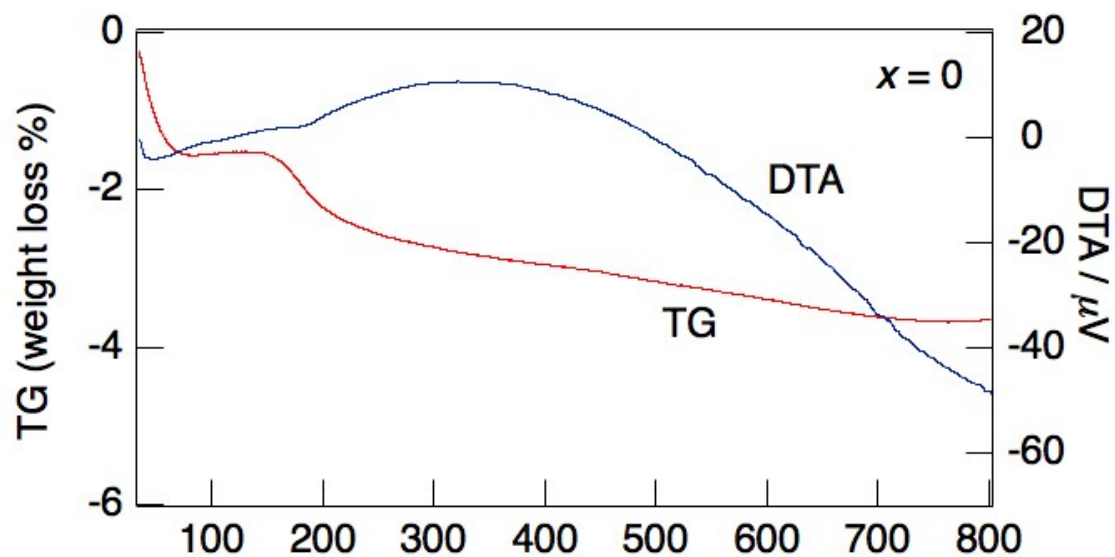

**Fig. 3S** TG/DTA curves for the sample with  $x = 0$  between  $30^\circ\text{C}$  and  $800^\circ\text{C}$  measured in a  $\text{N}_2$  gas flow.

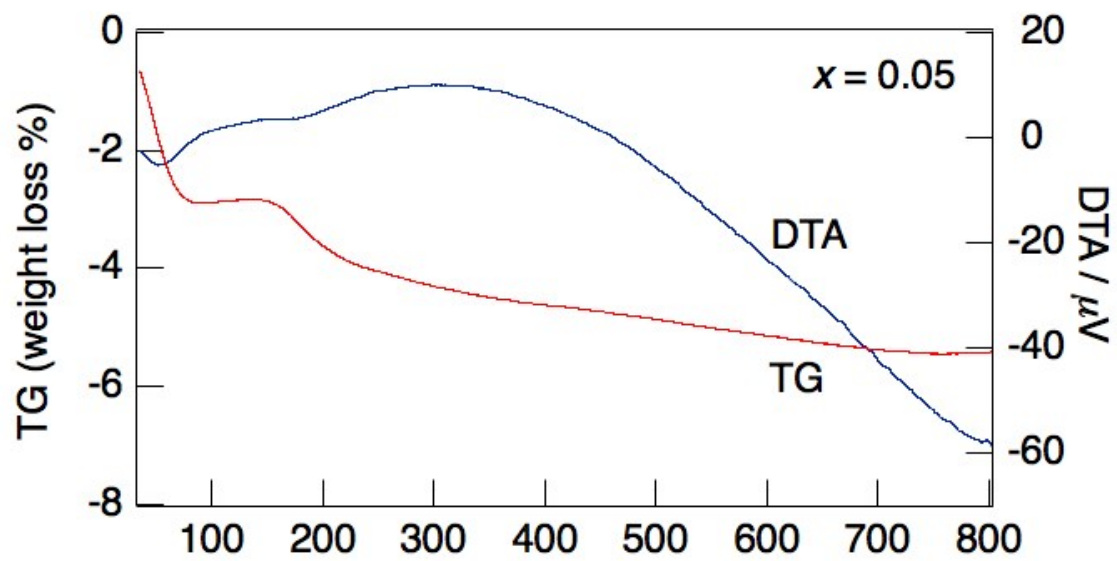

Fig. 4S TG/DTA curves for the sample with  $x = 0.05$  between 30°C and 800°C measured in a  $\text{N}_2$  gas flow.
